# Supplementary material
Source: HighWire-hosted journal article supplement (https://jnm.snmjournals.org/highwire/filestream/94144/field_highwire_adjunct_files/0/77461_Supp.pdf)
Supplement: 77461_Supp.pdf [file 77461_Supp.pdf]

The time-coordinate of the cutting point from any two individual linear SUV courses f and g, referred to as  $t_{ref}$ , is obtained by:

$$t_{ref} = \frac{a_g - a_f}{b_f - b_g} \quad \text{eq 1}$$

with a and b being the intercept and slope of the corresponding linear SUV course. As a next step, the individual intercepts  $a_f$  and  $a_g$  from line f and g are eliminated:

$$b_i(SUV_{t_0}) = a' + b' \cdot SUV_{t_0} \quad \text{eq 2}$$

From equation (2) for the secondary linear relationship between individual SUV slopes (b) and measured SUVs at a fixed time point ( $t_0$ ) one can calculate the slope  $b_f$  and  $b_g$  of line f and line g in dependency on the intercept and slope,  $a'$  and  $b'$ , of the secondary underlying linear relationship and resolve equation 2 for the individual intercepts  $a_f$  and  $a_g$  (exemplarily shown for line f):

$$\begin{aligned} b_f &= a' + b' \cdot (a_f + b_f \cdot t_0) \\ \Rightarrow a_f &= \frac{b_f - a'}{b'} - b_f \cdot t_0 \end{aligned} \quad \text{eq 3}$$

This expression for  $a_f$  and  $a_g$ , respectively, can now be inserted into eq 1 yielding

$$\begin{aligned} t_{ref} &= \frac{\frac{b_g - a'}{b'} - b_g \cdot t_0 - (\frac{b_f - a'}{b'} - b_f \cdot t_0)}{b_f - b_g} \\ &= \frac{t_0(b_f - b_g) - \frac{(b_f - b_g)}{b'}}{b_f - b_g} \\ &= t_0 - \frac{1}{b'} \end{aligned} \quad \text{eq 4}$$

The resulting expression for  $t_{ref}$  is not dependent on any individual intercepts  $a_i$  nor on individual slopes  $b_i$ .

The SUV-coordinate of the reference point, i.e.  $SUV_{ref}$ , is found by inserting  $t_{ref}$  into any individual time course, e.g. line f:

$$SUV_{ref} = a_f + b_f \cdot (t_0 - \frac{1}{b'}) \quad \text{eq 5}$$

By inserting the expression for the individual intercept of line f ( $a_f$  from eq 3) one ends up with

$$\begin{aligned}SUV_{ref} &= \frac{b_f - a'}{b'} - b_f \cdot t_0 + b_f \cdot \left(t_0 - \frac{1}{b'}\right) \\ &= -\frac{a'}{b'}\end{aligned}$$

eq 6
